# Supplementary material for: Co-treatment of tumor cells with hyaluronan plus doxorubicin affects endothelial cell behavior independently of VEGF expression
Source: PubMed Central journal article supplement (PMC6290962; doi:10.18632/oncotarget.26379), 2018-11-27
Supplement: oncotarget-09-36585-s001.pdf [file oncotarget-09-36585-s001.pdf]

## Co-treatment of tumor cells with hyaluronan plus doxorubicin affects endothelial cell behavior independently of VEGF expression

### SUPPLEMENTARY MATERIALS

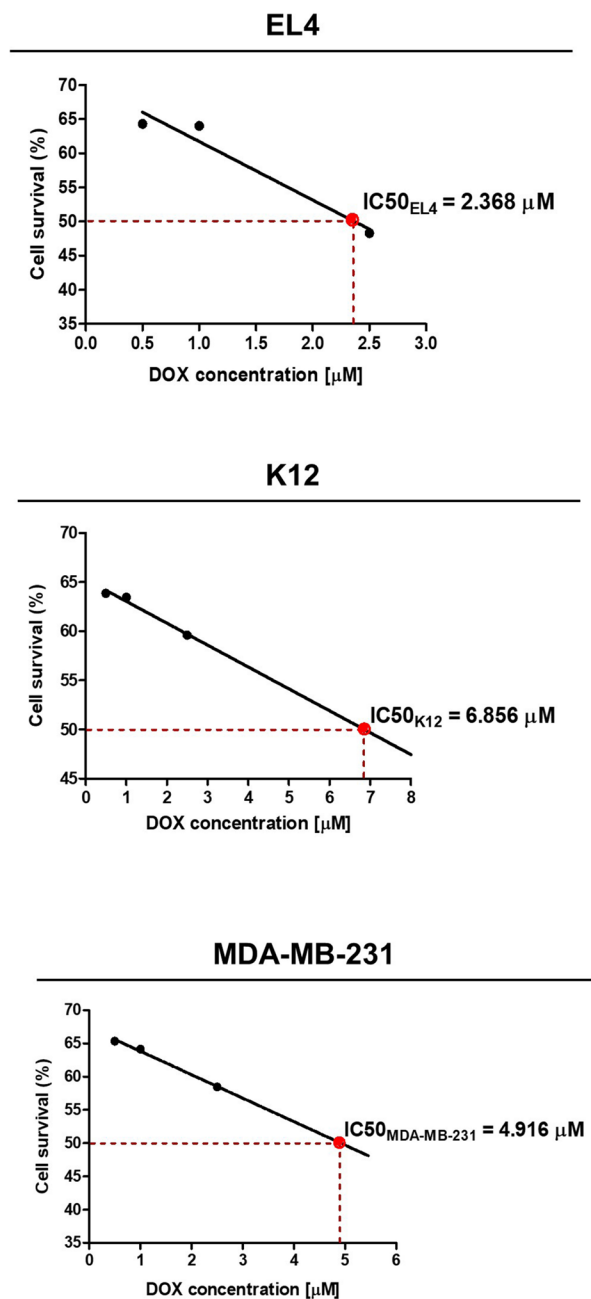

**Supplementary Figure 1: Determination of IC<sub>50</sub> values for DOX in tumor cell lines.** EL4, K12, MDA-MB-231 cells were treated in triplicate wells for 12 hours with varying concentrations of DOX. Following treatment, cell survival was determined by Annexin V assays. Each data point represents the average of values obtained in 3 independent experiments. IC<sub>50</sub> values ( $\mu\text{M}$ ) were determined using the software Prism (GraphPad, San Diego, CA, USA).

## EL4

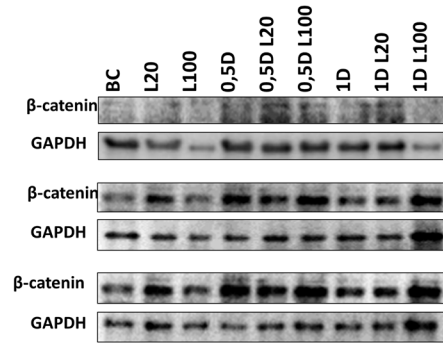

## K12

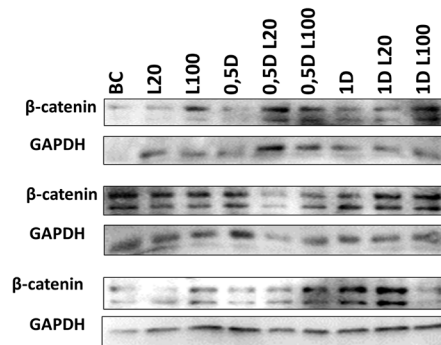

## MDA-MB-231

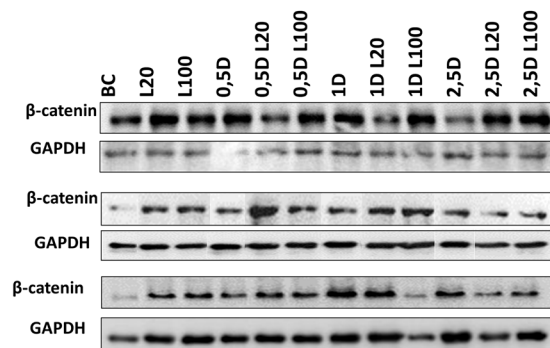

**Supplementary Figure 2: Original nitrocellulose membranes from  $\beta$ -Catenin western blot.** Protein expression of  $\beta$ -Catenin evaluated in EL4, K12 and MDA-MB-231 cells in 3 independent western blot membranes. The proteins levels were quantified as described in Material and Methods.

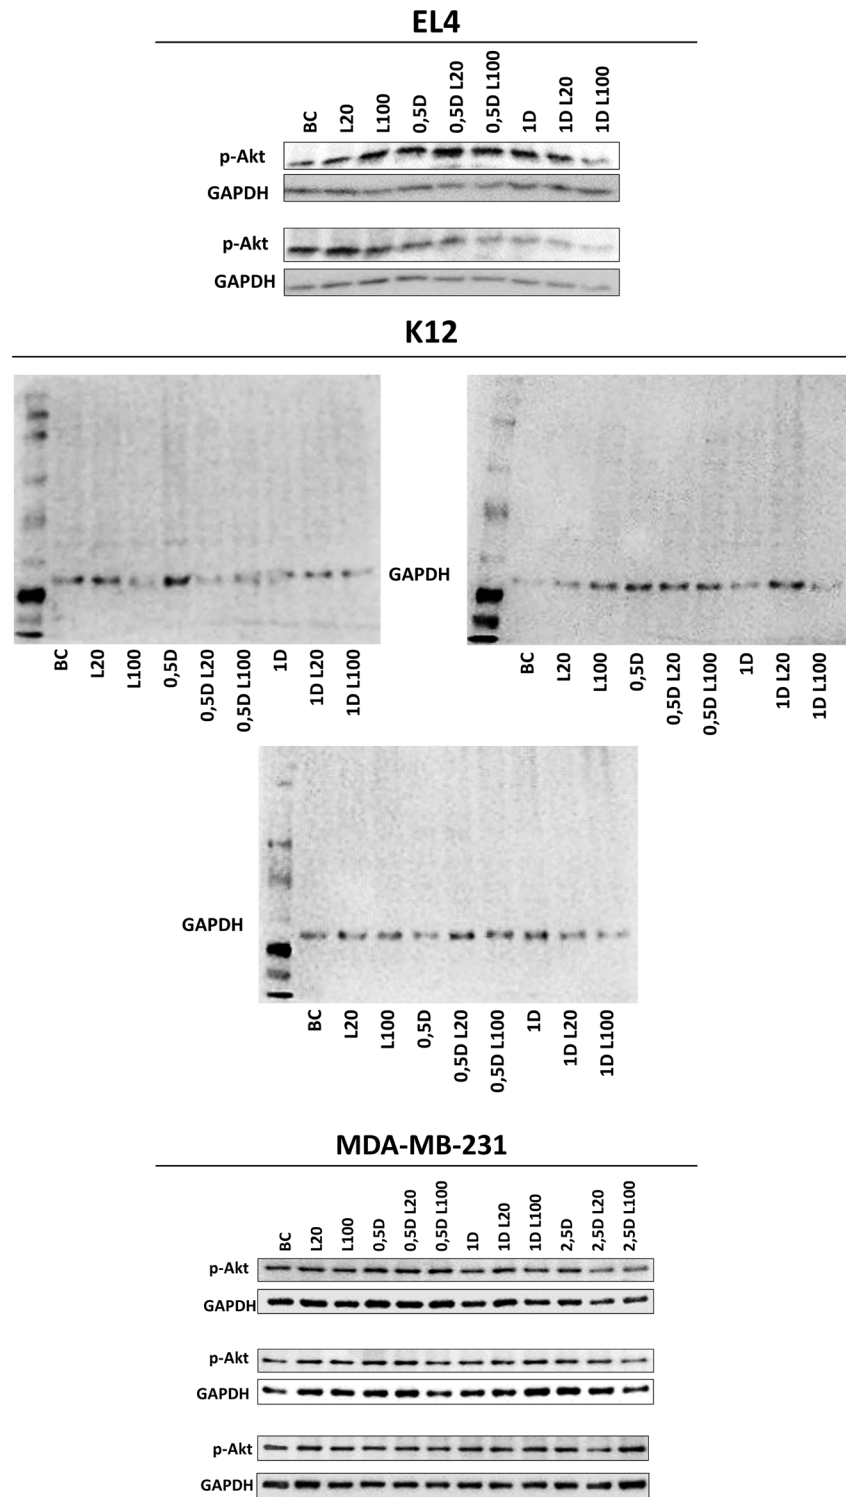

**Supplementary Figure 3: Original nitrocellulose membranes from p-Akt western blot.** Protein expression of p-Akt evaluated in EL4, K12 and MDA-MB-231 cells in 3 independent western blot membranes. The proteins levels were quantified as described in Material and Methods.
